# Supplementary material for: Photothermal Möbius aromatic metallapentalenofuran and its NIR-responsive copolymer
Source: Royal Society of Chemistry journal article supplement (doi:10.1039/c8py00176f), 2018-01-01
Supplement: c8py00176f2.pdf [file c8py00176f2.pdf]

Electronic Supplementary Information

## **Photothermal Möbius Aromatic Metallapentalenofuran and Its NIR-Responsive Copolymer**

Zhengyu Lu,<sup>a,b</sup> Yuanting Cai,<sup>b</sup> Yuanqing Wei,<sup>b</sup> Qin Lin,<sup>a</sup> Jiangxi Chen,<sup>\*,a</sup> Xumin He,<sup>b</sup> Shunhua Li,<sup>b</sup> Weitai Wu<sup>b</sup> and Haiping Xia<sup>\*,b</sup>

<sup>a</sup>Department of Materials Science and Engineering, College of Materials, Xiamen University, Xiamen 361005, People's Republic of China.

<sup>b</sup>State Key Laboratory of Physical Chemistry of Solid Surfaces and Collaborative Innovation Center of Chemistry for Energy Materials (iChEM), College of Chemistry and Chemical Engineering, Xiamen University, Xiamen 361005, People's Republic of China.

### **Contents**

|                                           |            |
|-------------------------------------------|------------|
| <b>1. Spectroscopic Data</b>              | <b>S2</b>  |
| <b>2. X-ray molecular structure for 9</b> | <b>S15</b> |

# 1. Spectroscopic Data

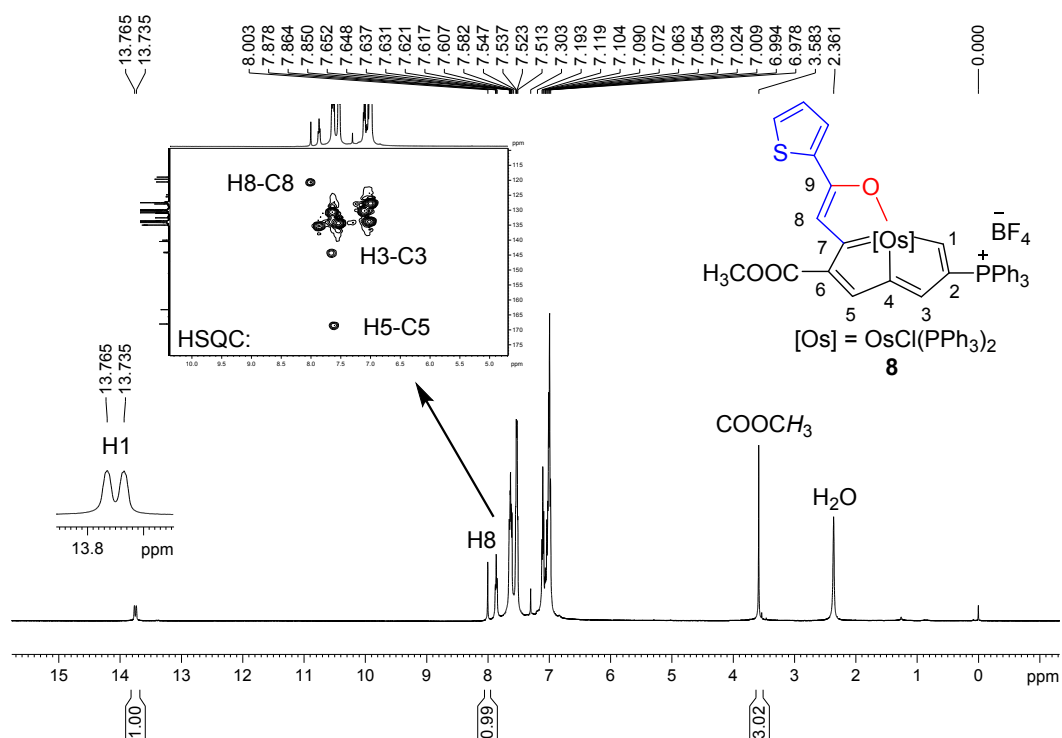

**Figure S1** The  $^1\text{H}$  NMR (500.2 MHz,  $\text{CDCl}_3$ ) spectrum (inset: partial  $^1\text{H}$ - $^{13}\text{C}$  HSQC spectrum) for complex **8**.

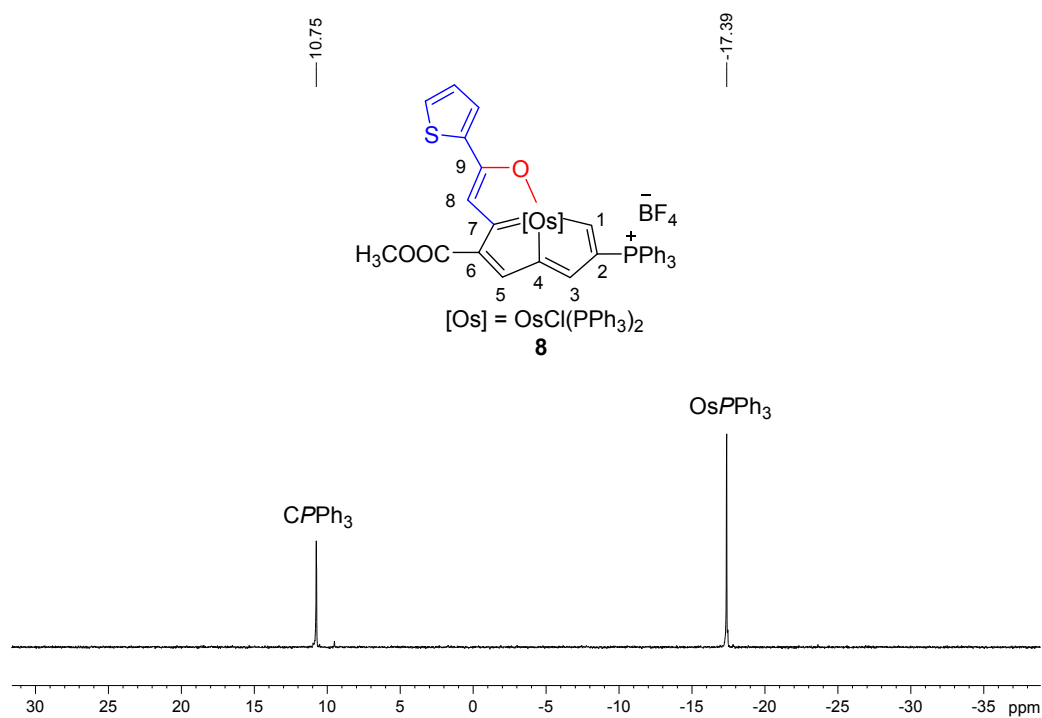

**Figure S2** The  $^{31}\text{P}\{^1\text{H}\}$  NMR (202.5 MHz,  $\text{CDCl}_3$ ) spectrum for complex **8**.

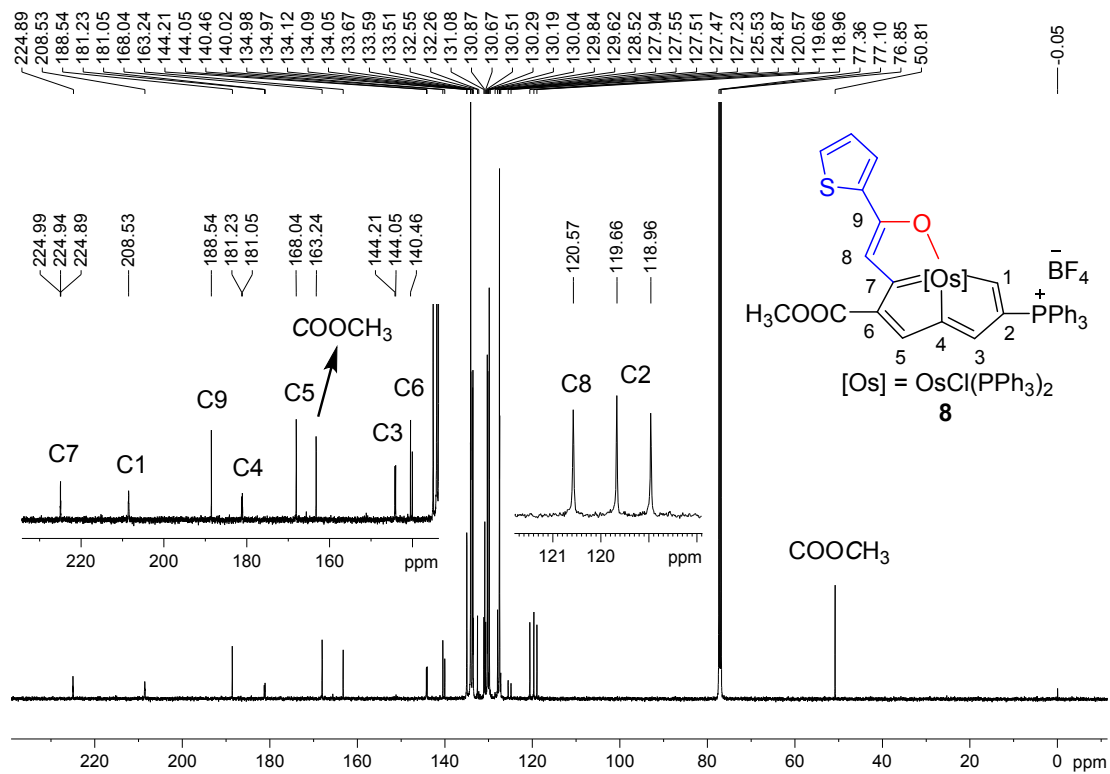

**Figure S3** The  $^{13}\text{C}\{^1\text{H}\}$  NMR (125.8 MHz,  $\text{CDCl}_3$ ) spectrum for complex **8**.

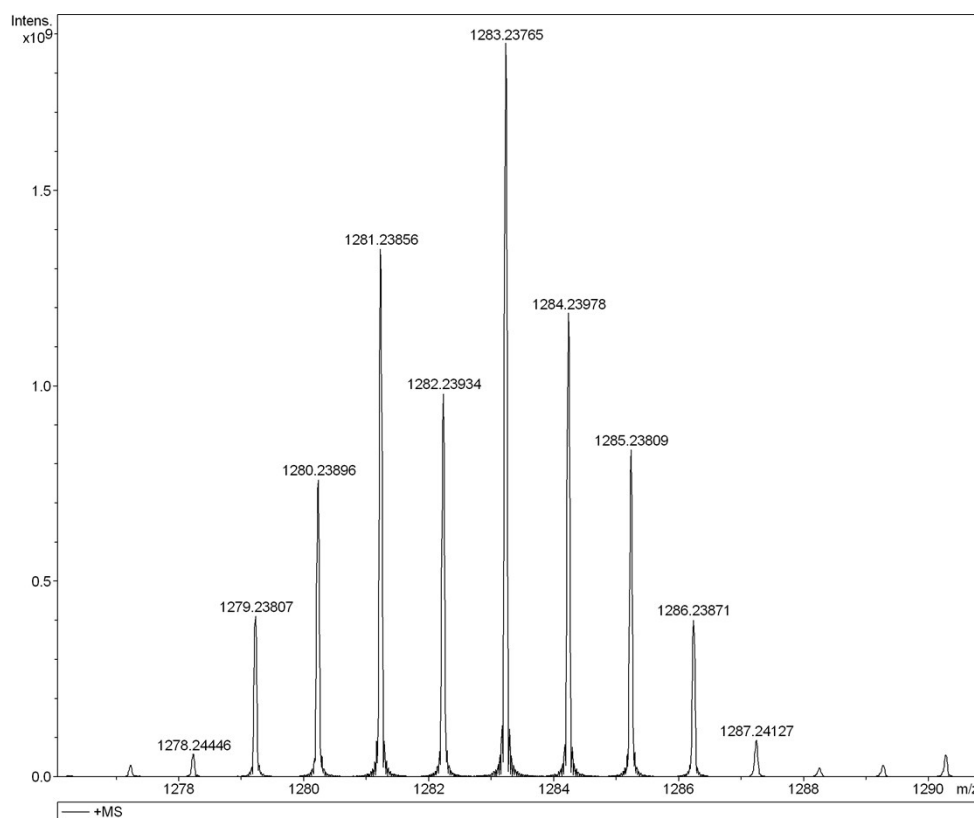

**Figure S4.** Positive-ion ESI-MS spectrum of  $[\mathbf{8}]^+$  measured in dichloromethane.

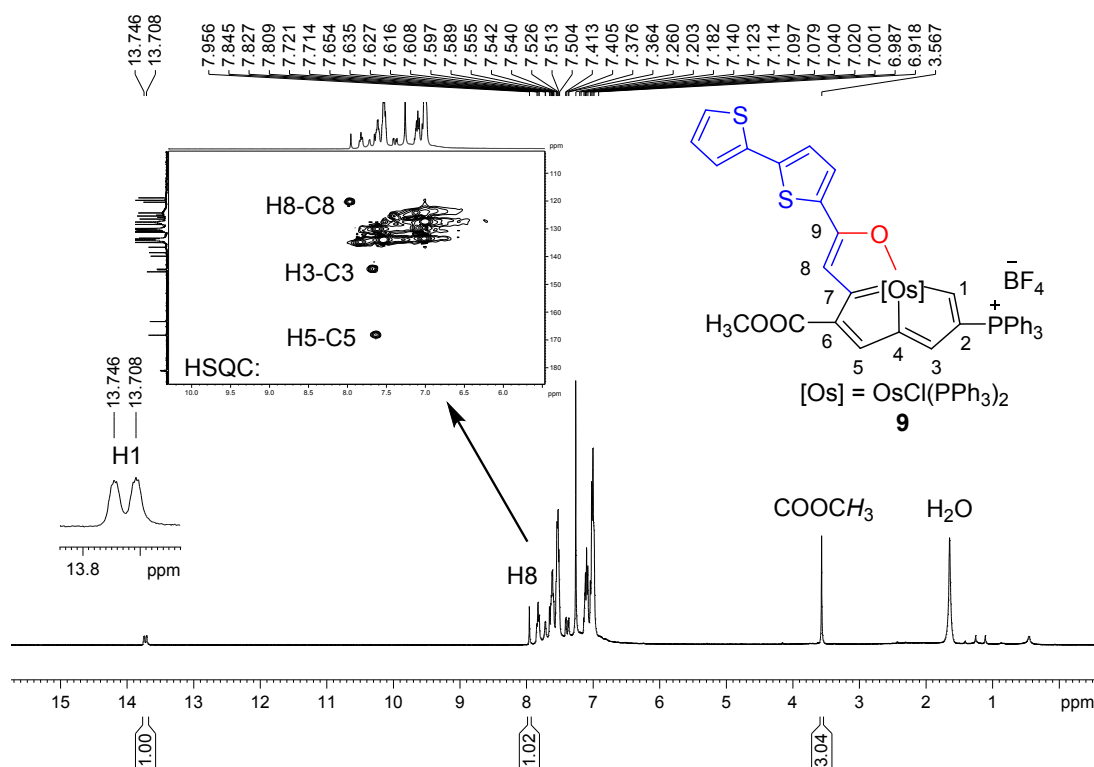

**Figure S5** The  $^1\text{H}$  NMR (400.1 MHz,  $\text{CDCl}_3$ ) spectrum (inset: partial  $^1\text{H}$ - $^{13}\text{C}$  HSQC spectrum) for complex **9**.

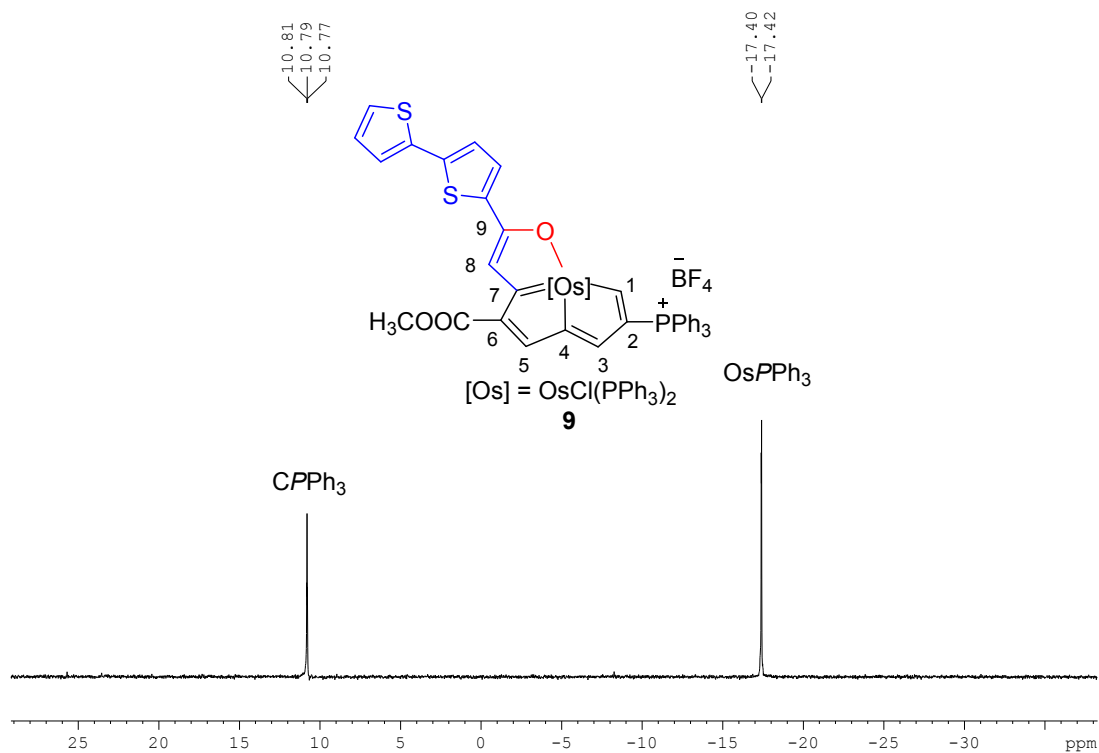

**Figure S6** The  $^{31}\text{P}\{^1\text{H}\}$  NMR (162.0 MHz,  $\text{CDCl}_3$ ) spectrum for complex **9**.

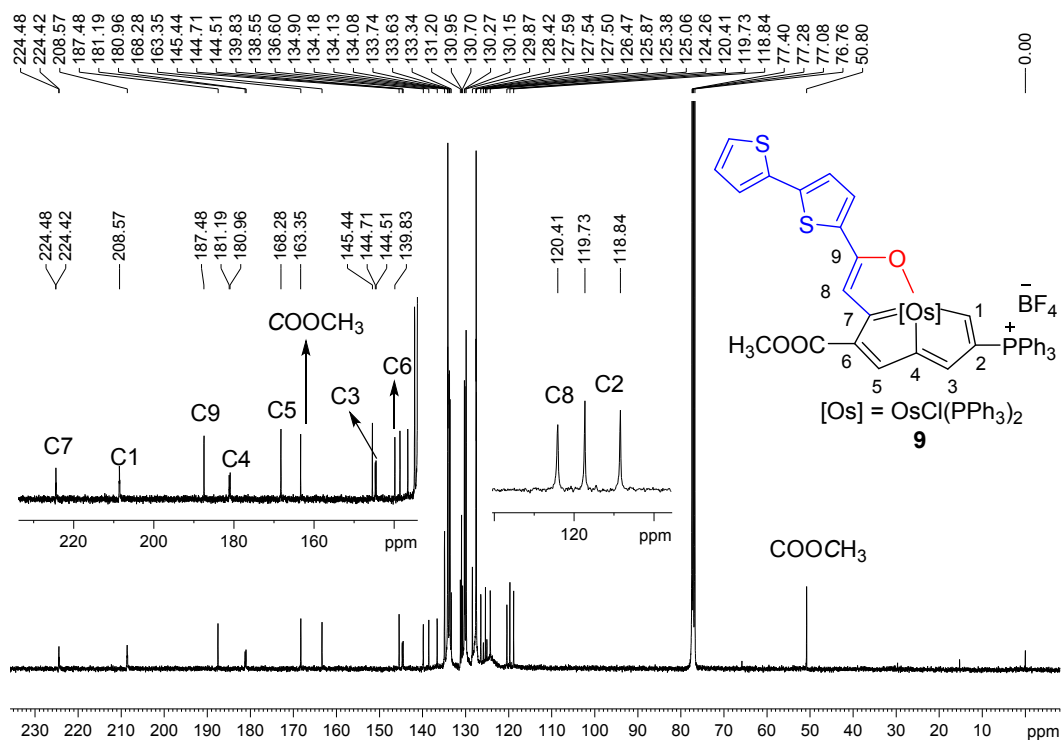

**Figure S7** The  $^{13}\text{C}\{^1\text{H}\}$  NMR (100.6 MHz,  $\text{CDCl}_3$ ) spectrum for complex **9**.

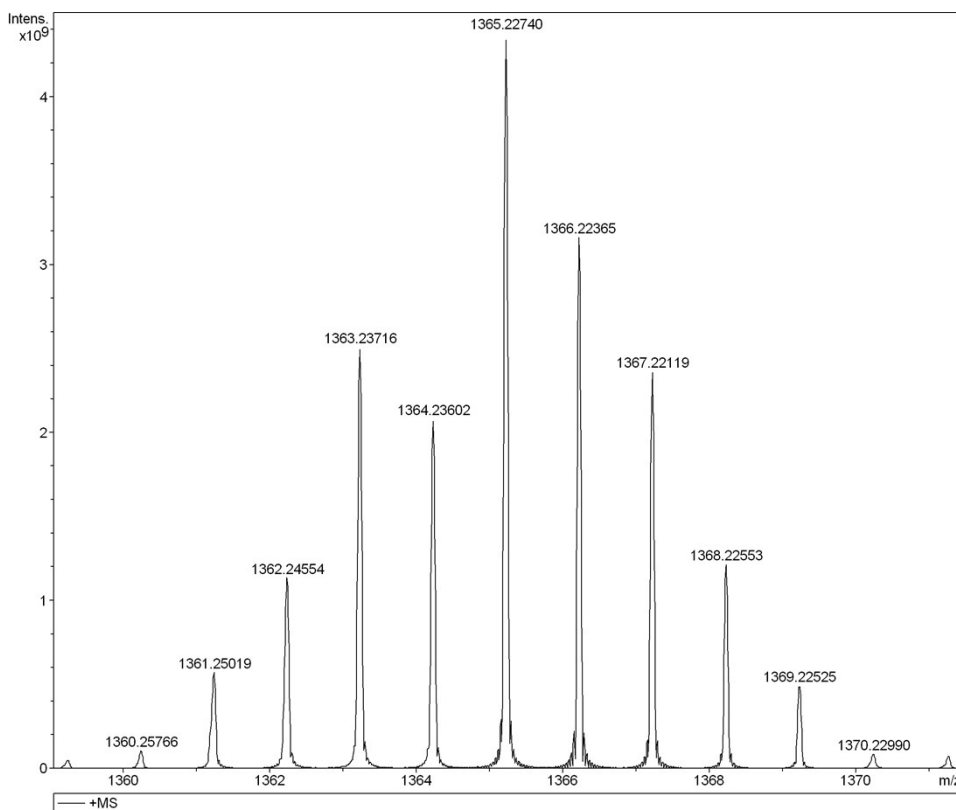

**Figure S8** Positive-ion ESI-MS spectrum of  $[\mathbf{9}]^+$  measured in dichloromethane.

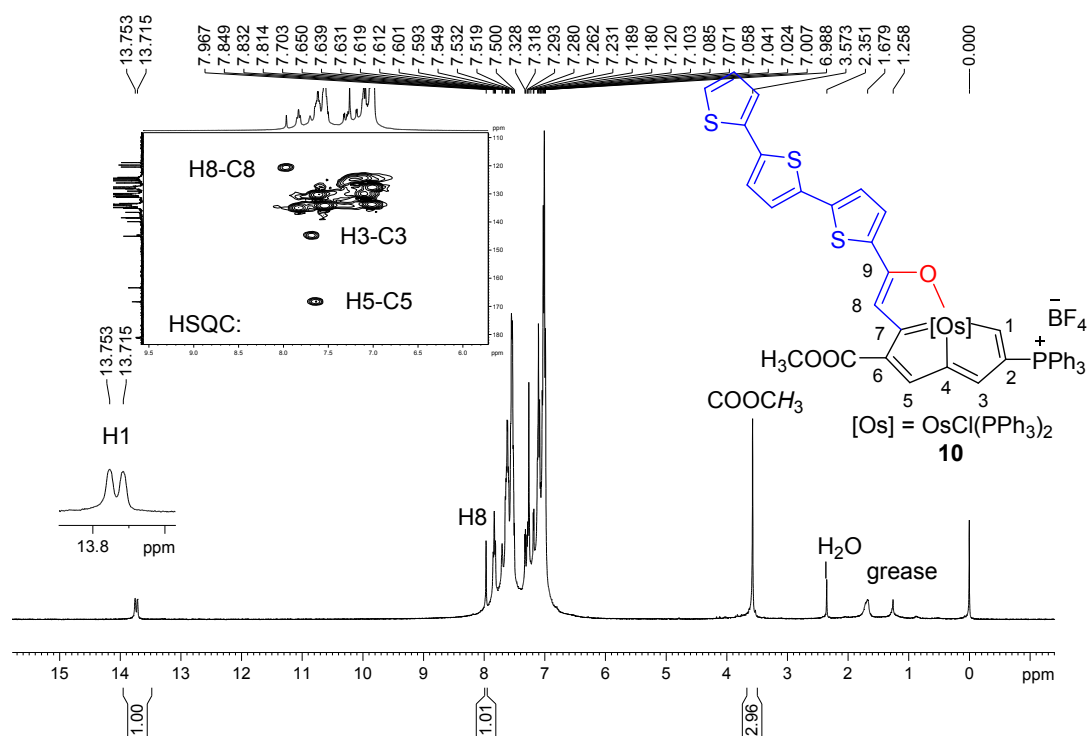

**Figure S9** The  $^1\text{H}$  NMR (400.1 MHz,  $\text{CDCl}_3$ ) spectrum (inset: partial  $^1\text{H}$ - $^{13}\text{C}$  HSQC spectrum) for complex **10**.

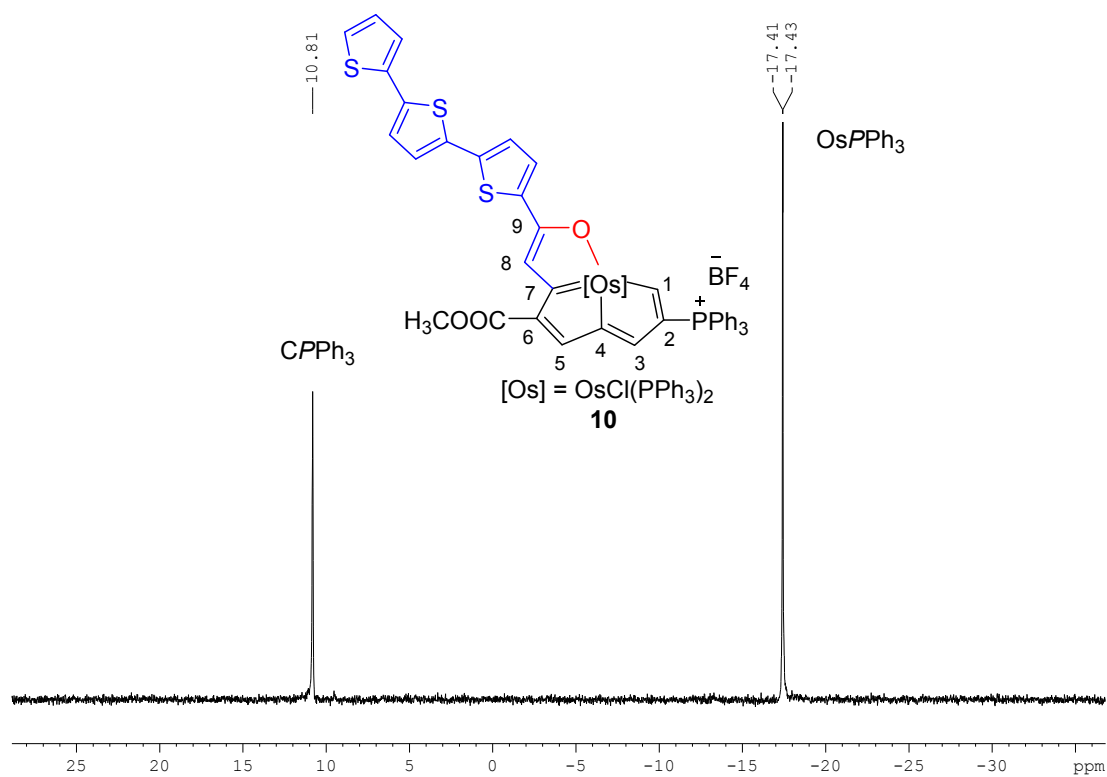

**Figure S10** The  $^{31}\text{P}\{^1\text{H}\}$  NMR (162.0 MHz,  $\text{CDCl}_3$ ) spectrum for complex **10**.

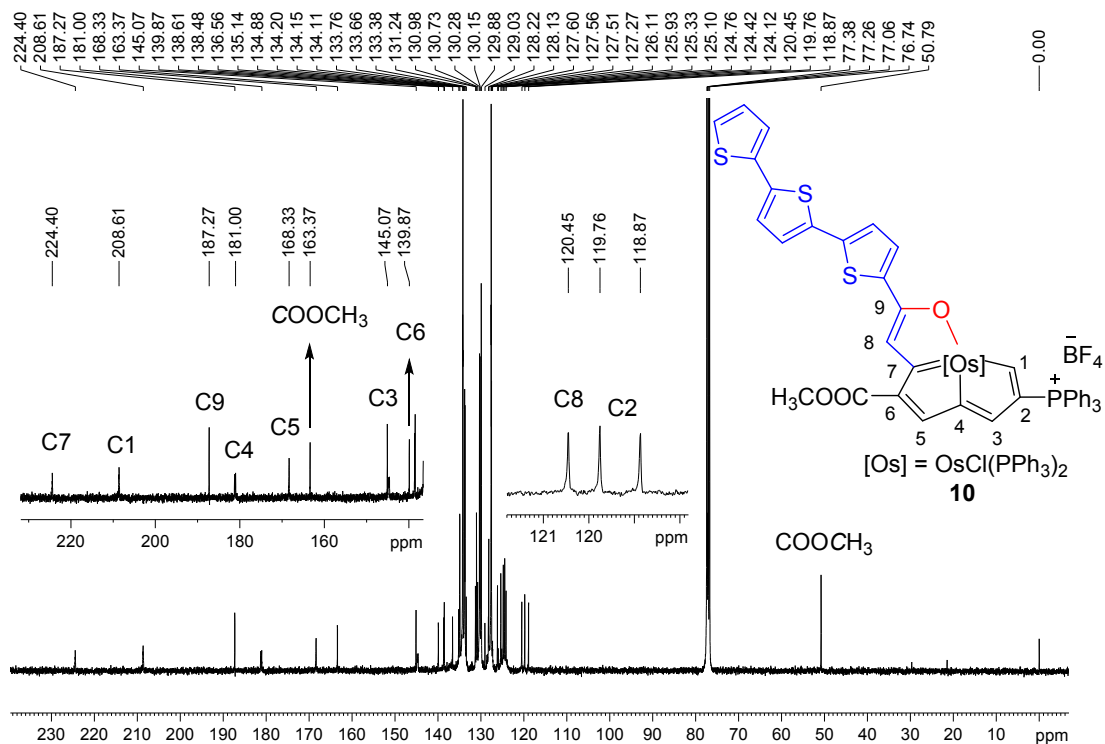

**Figure S11** The  $^{13}\text{C}\{^1\text{H}\}$  NMR (100.6 MHz,  $\text{CDCl}_3$ ) spectrum for complex **10**.

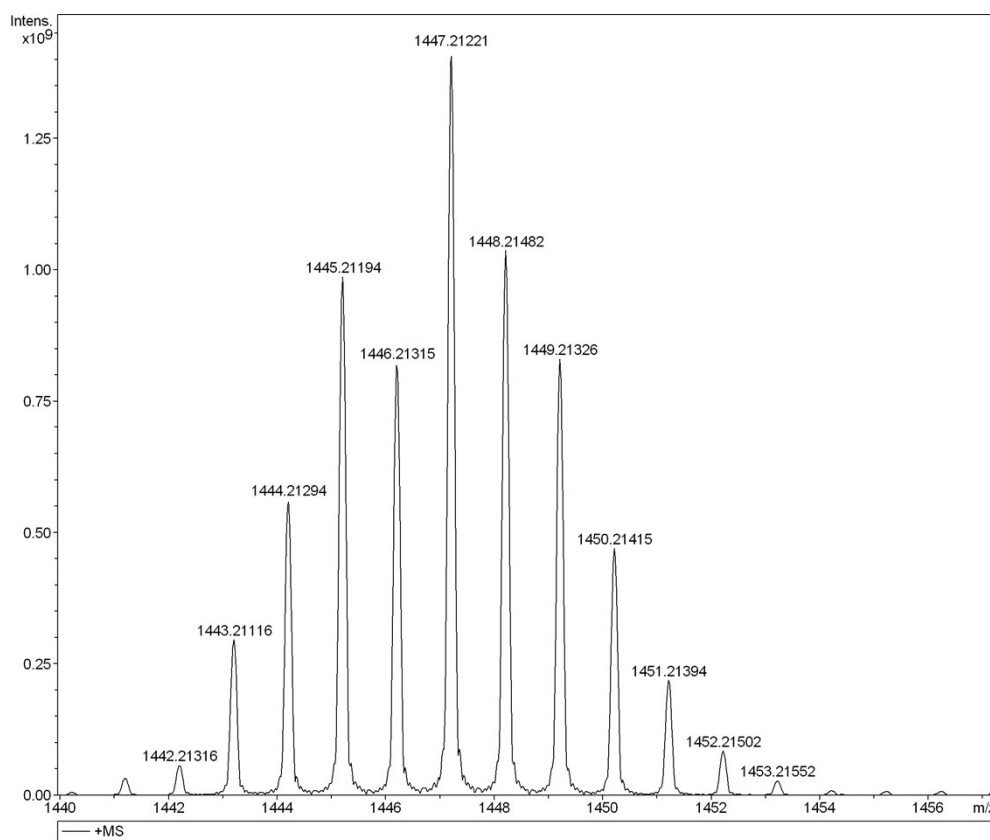

**Figure S12** Positive-ion ESI-MS spectrum of  $[\mathbf{10}]^+$  measured in dichloromethane.

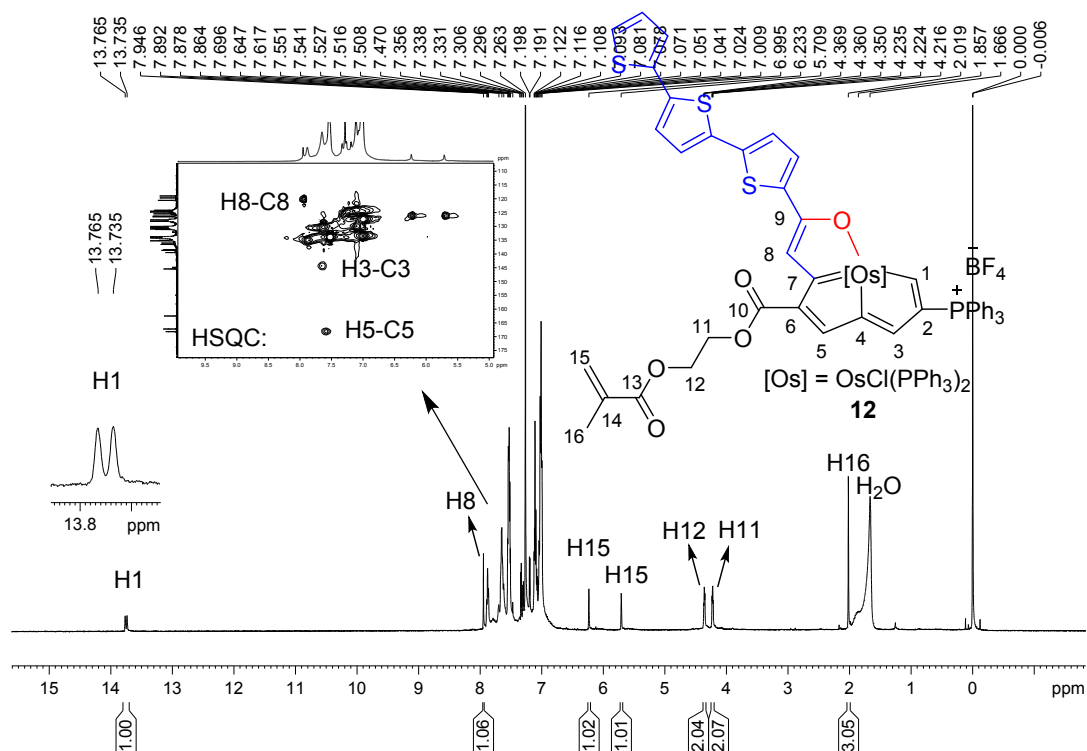

**Figure S13** The  $^1\text{H}$  NMR (500.2 MHz,  $\text{CDCl}_3$ ) spectrum (inset: partial  $^1\text{H}$ - $^{13}\text{C}$  HSQC spectrum) for complex **12**

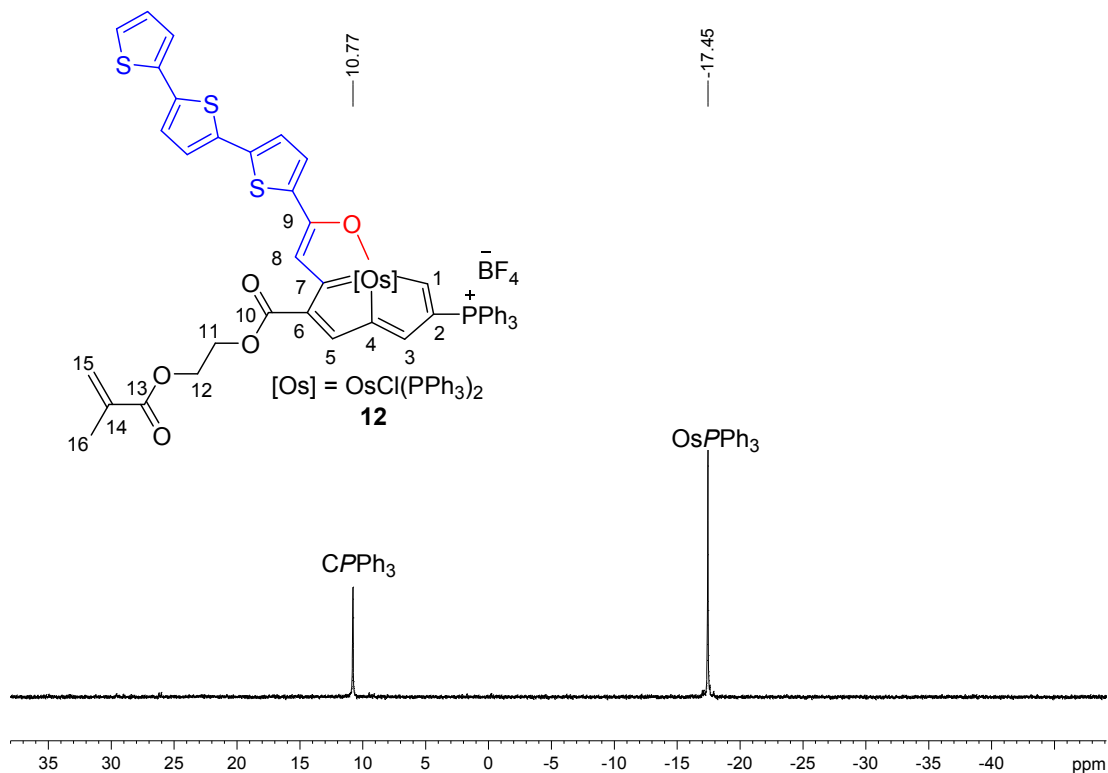

**Figure S14** The  $^{31}\text{P}\{^1\text{H}\}$  NMR (202.5 MHz,  $\text{CDCl}_3$ ) spectrum for complex **12**



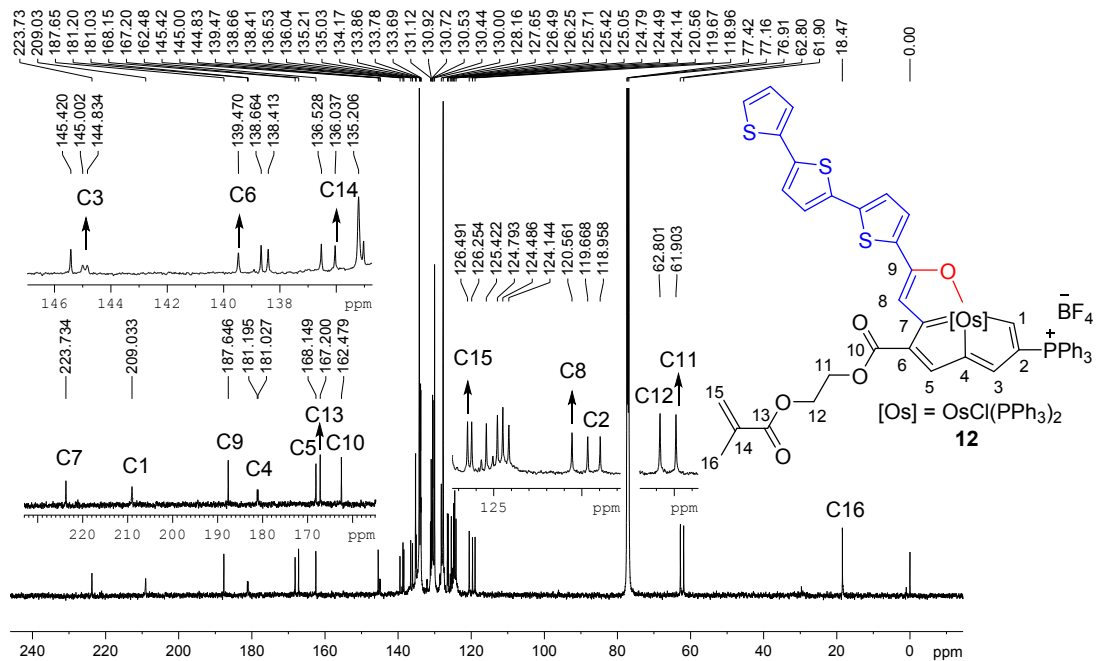

**Figure S15** The  $^{13}\text{C}\{^1\text{H}\}$  NMR (125.8 MHz,  $\text{CDCl}_3$ ) spectrum for complex **12**

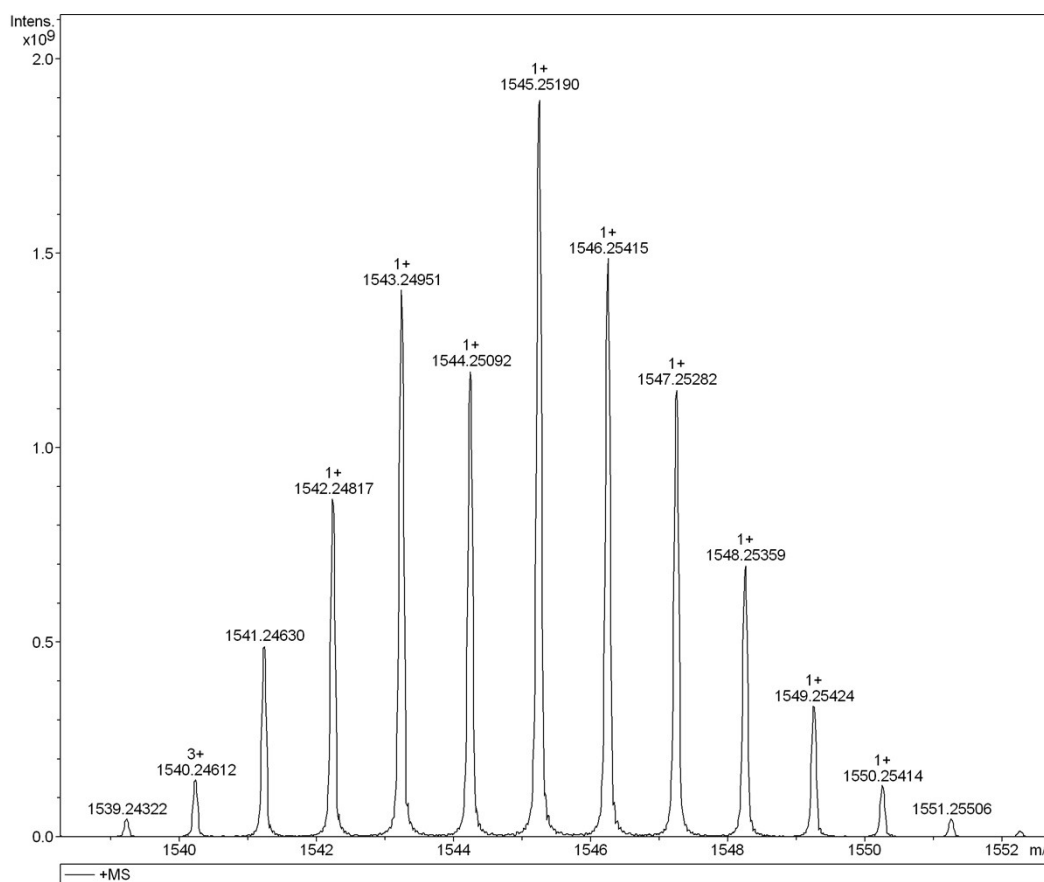

**Figure S16** Positive-ion ESI-MS spectrum of  $[\mathbf{12}]^+$  measured in dichloromethane.

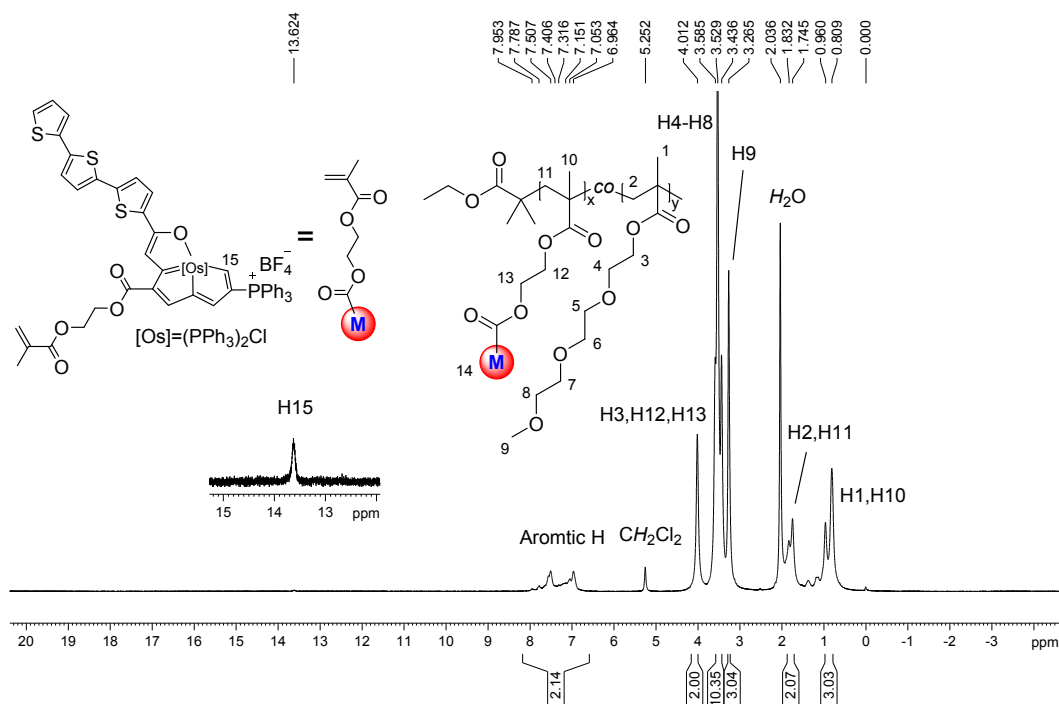

**Figure S17** The  $^1\text{H}$  NMR (500.2 MHz,  $\text{CD}_2\text{Cl}_2$ ) spectrum for copolymer **13**

The unit ratio of **12/14** (x/y) in metallopolymer **13** can be calculated to be 1:26.0 via the integration intensity ratio of aromatic protons (55 aromatic protons per metallopolymer **13**) verse  $\text{H}_9$ .

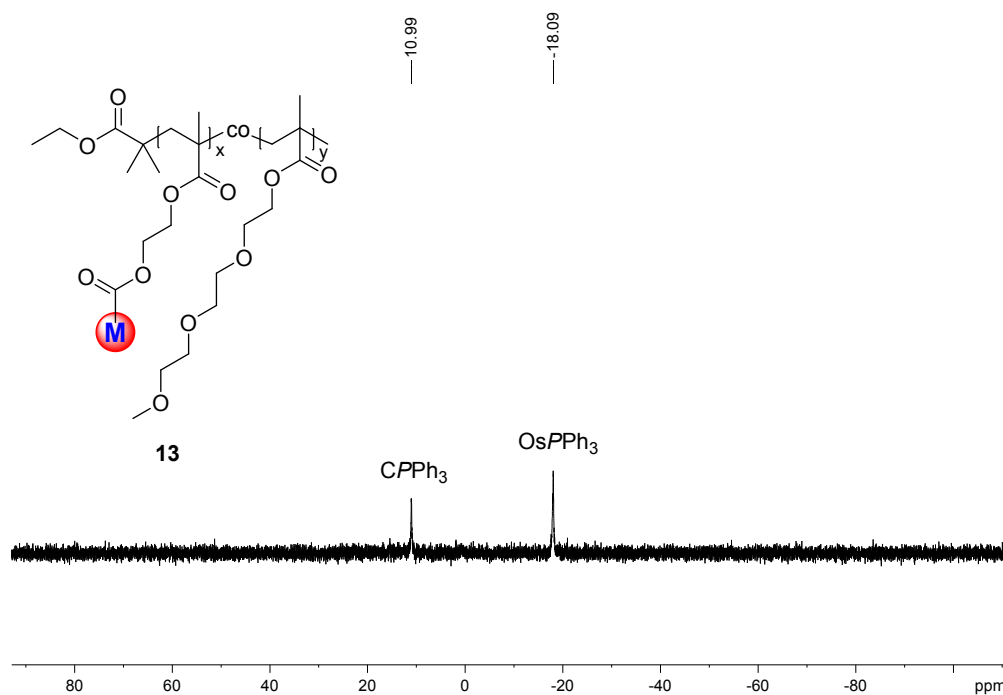

**Figure S18** The  $^{31}\text{P}\{^1\text{H}\}$  NMR (202.5 MHz,  $\text{CD}_2\text{Cl}_2$ ) spectrum for copolymer **13**

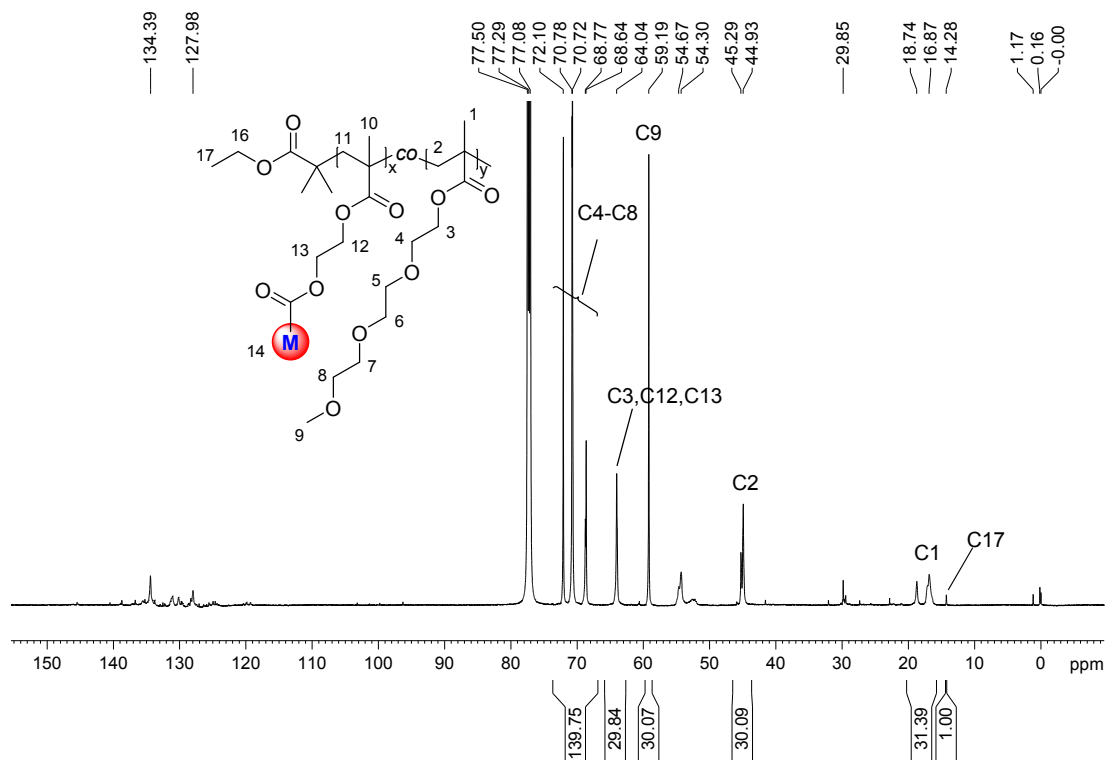

**Figure S19** The inverse gated  $^{13}\text{C}\{^1\text{H}\}$  NMR (150.9 MHz,  $\text{CDCl}_3$ ) spectrum of copolymer **13**

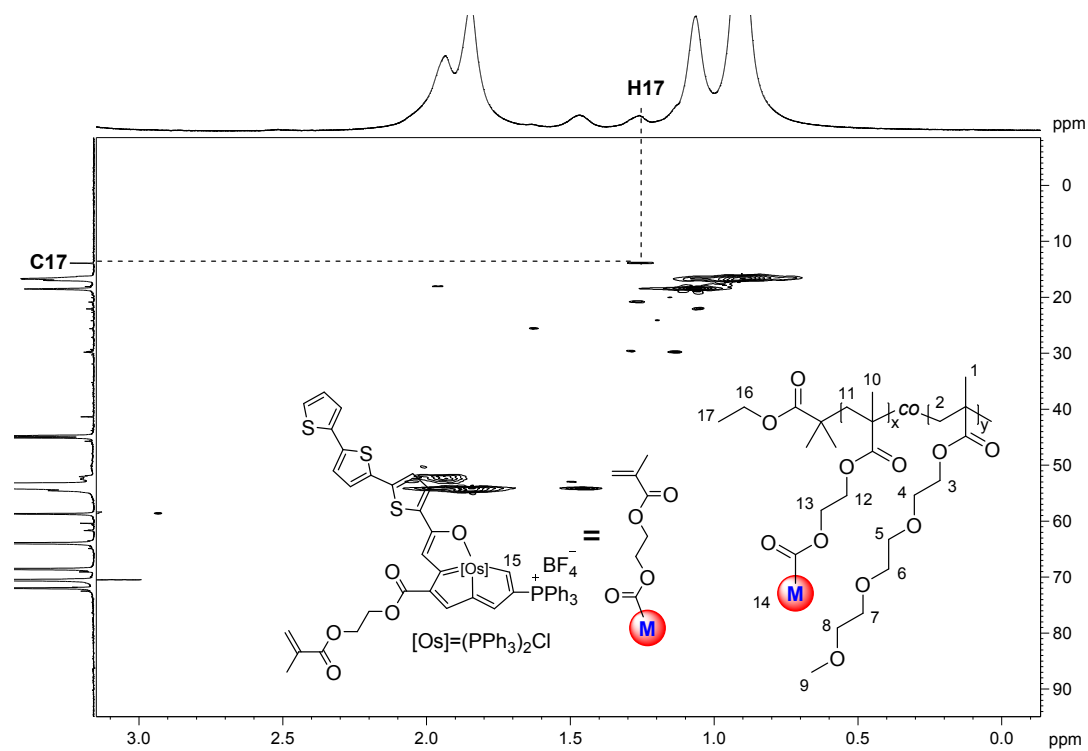

**Figure S20** The  $^1\text{H}$ - $^{13}\text{C}$  HSQC spectrum of copolymer **13** in  $\text{CDCl}_3$ .

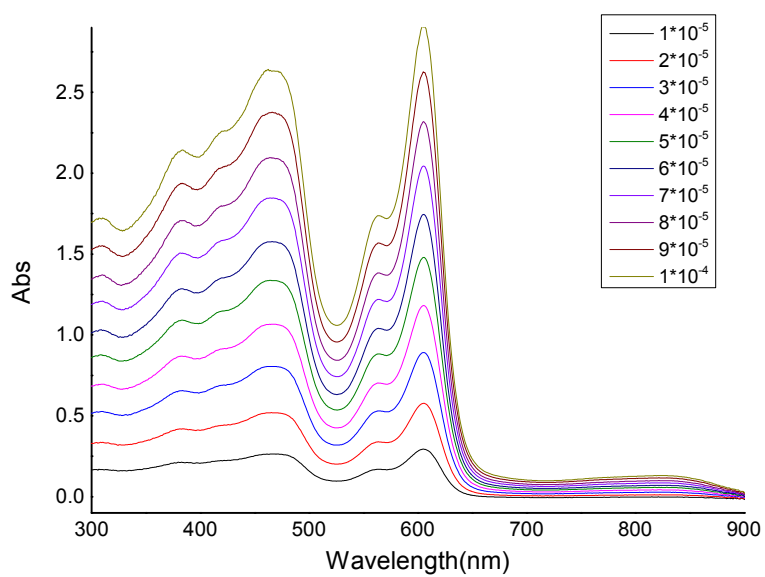

**Figure S21** UV-Vis-NIR absorption spectrum of different concentrations of **10** in  $\text{CH}_2\text{Cl}_2$ .

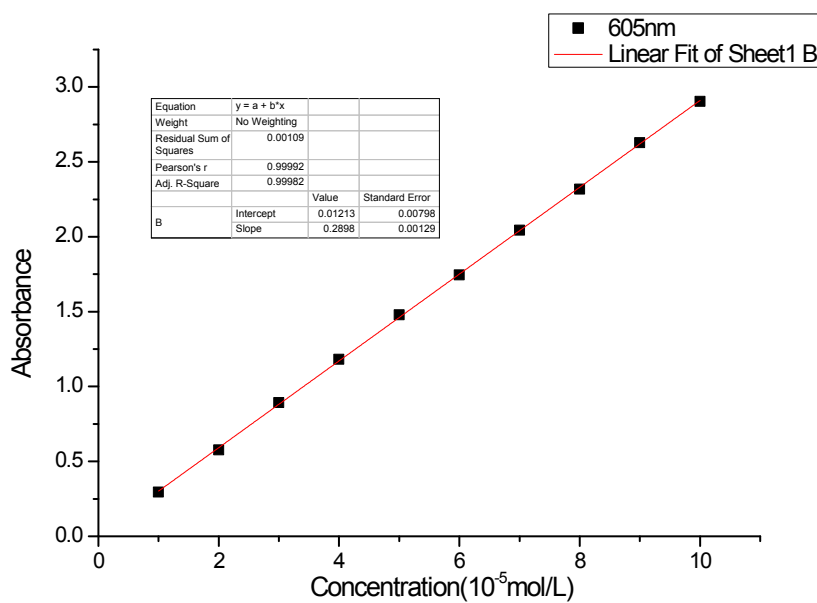

**Figure S22** The linear relationship between the concentrations and absorption intensities of **10** at 605 nm.

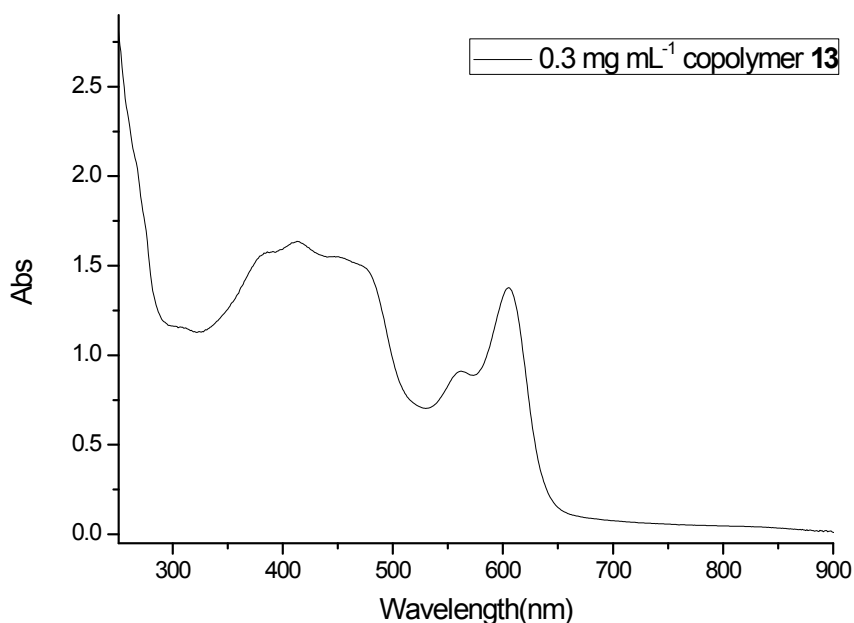

**Figure S23** UV-Vis-NIR Absorption spectrum of 0.3 mg/mL **13** in CH<sub>2</sub>Cl<sub>2</sub>.

The unit ratio of **12/14** (x/y) in metallopolymer **13** was calculated by the following equation:

$$x/y = n_{12}/n_{14} = n_{12}/(W_{14}/M_{14}) = n_{12}/[(W_{\text{all}}-W_{12})/M_{14}] = n_{12}/[(W_{\text{all}}-n_{12}\times M_{12})/M_{14}] = 4.547\times 10^{-5}/[(0.3-4.547\times 10^{-5}\times 1632)/232.3] = 1/21.4$$

Where  $n_{12}$  and  $n_{14}$  are the molar concentrations of **12** and **14**;  $n_{12}$  is calculated to be  $4.547\times 10^{-5}$  mol/L by using the absorption value in Figure S23 and the standard UV-Vis absorption curve of complex **10** (Figure S22).  $W_{14}$ ,  $W_{12}$  and  $W_{\text{all}}$  are mass concentrations of **12**, **14** and copolymer **13**, respectively;  $M_{12}$  and  $M_{14}$  are molecular weights of **12** and **14**.

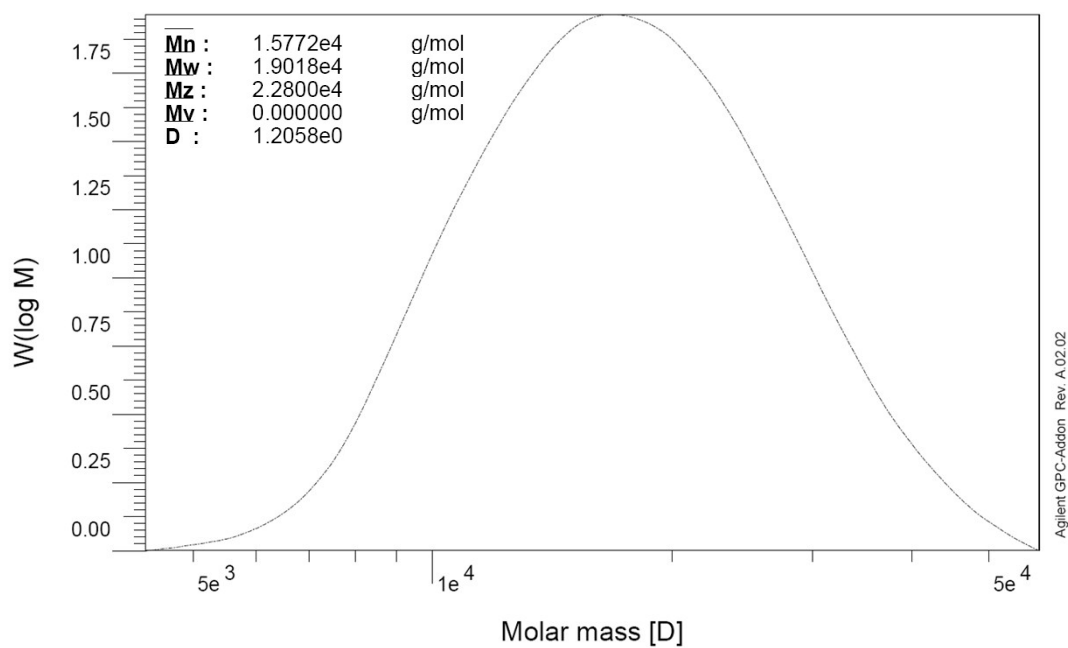

**Figure S24** Molecular weight and its distribution of copolymer **13** determined by SEC in tetrahydrofuran relative to narrow molecular weight polystyrenes.

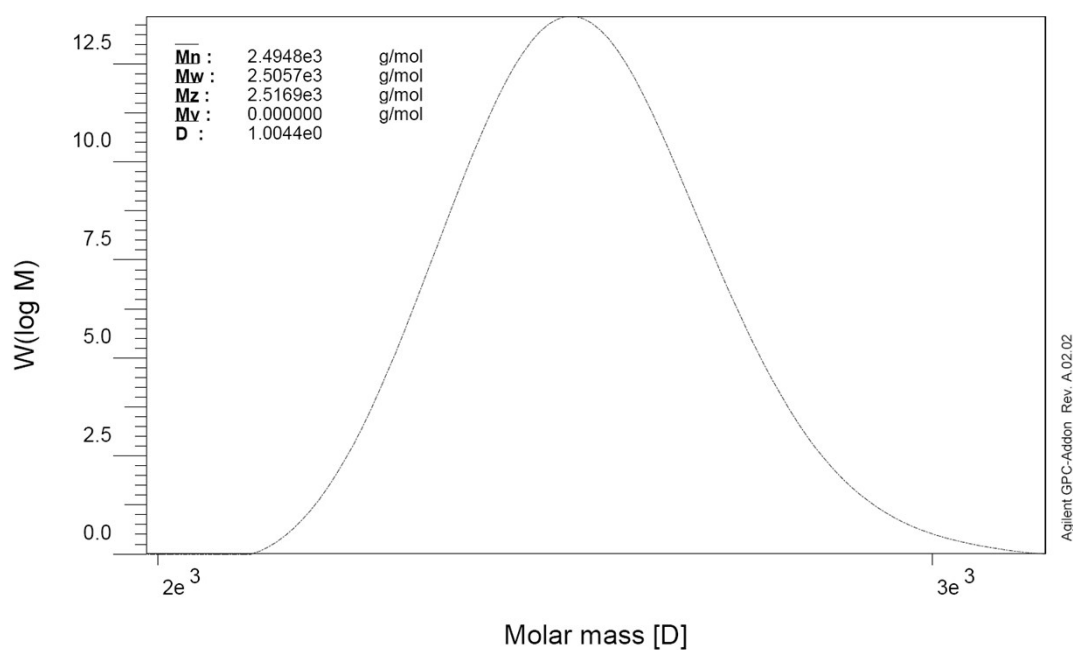

**Figure S25** Molecular weight and its distribution of monomer **12** determined by SEC in tetrahydrofuran relative to narrow molecular weight polystyrenes.

## 2. X-ray molecular structure for 9

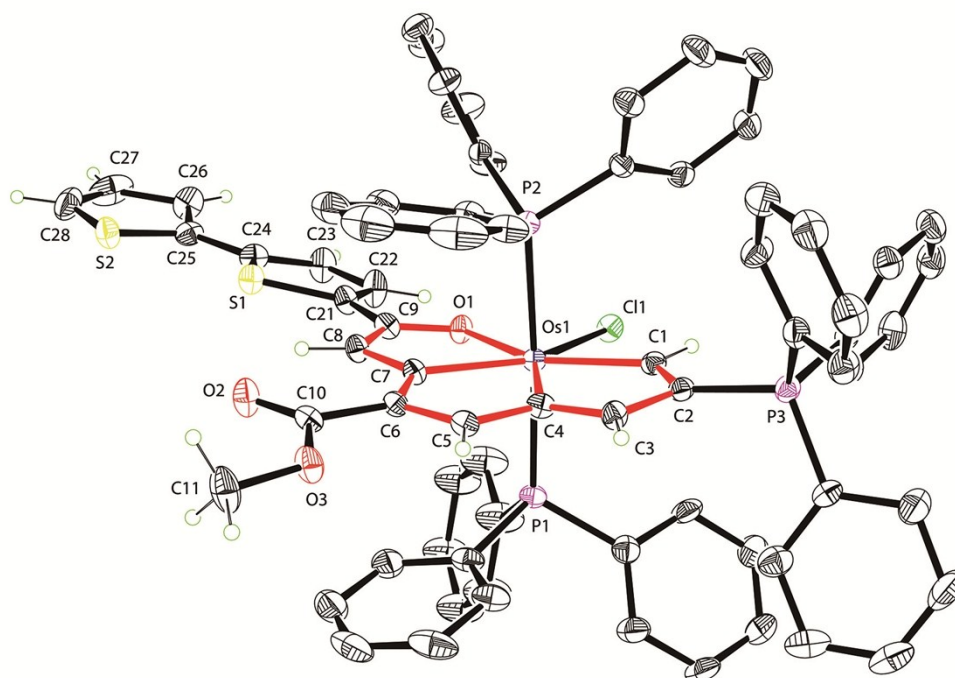

**Figure S26** X-ray molecular structure for the cation of **9** (ellipsoids set at 50% probability). Hydrogen atoms in the PPh<sub>3</sub> groups are omitted for clarity. Selected bond lengths [Å] and angles [°]: Os1–C1 2.091(5), Os1–C4 2.138(5), Os1–C7 2.129(5), Os1–O1 2.108(3), C1–C2 1.348(7), C2–C3 1.426(7), C3–C4 1.350(7), C4–C5 1.420(7), C5–C6 1.349(7), C6–C7 1.440(7), C7–C8 1.376(7), C8–C9 1.377(7), C9–O1 1.298(6); Os1–C1–C2 124.4(4), C1–C2–C3 111.4(5), C2–C3–C4 112.1(5), C3–C4–Os1 122.1(4), C4–Os1–C1 69.99(19), Os1–C4–C5 118.4(4), C4–C5–C6 116.3(5), C5–C6–C7 112.5(4), C6–C7–Os1 120.0(4), C7–Os1–C4 72.7(2), Os1–C7–C8 117.2(4), C7–C8–C9 113.7(5), C8–C9–O1 116.4(5), C9–O1–Os1 119.7(3), O1–Os1–C7 72.67(17).
